# Supplementary material for: Combinations of Peptide-Protein Extracts from Native Probiotics Suppress the Growth of Multidrug-Resistant Staphylococcus aureus and Citrobacter freundii via Membrane Perturbation and Ultrastructural Changes
Source: Antibiotics (Basel). 2022 Jan 25;11(2):154. doi: 10.3390/antibiotics11020154 (PMC8868453; doi:10.3390/antibiotics11020154)
Supplement: Supplementary file 1 [file antibiotics-11-00154-s001.zip › Table S1.pdf]

**Table S1.** Antibiotic susceptibility of the *Citrobacter freundii* B3Sm1

| Antimicrobial agent          | Zone diameter of disk (mm) | Interpretation criteria /Susceptibility* | E-test strip MIC (mg/L) | **EFSA cut-off values (mg/L) [EFSA, 2012] |
|------------------------------|----------------------------|------------------------------------------|-------------------------|-------------------------------------------|
| Amoxicillin: clavulanic acid | 10                         | R                                        | 32                      | $\geq 32$                                 |
| Ampicillin                   | 6                          | R                                        | 16                      | $\geq 8$                                  |
| Cefotaxime                   | 6                          | R                                        | 8                       | $\geq 4$                                  |
| Gentamycin                   | 7                          | R                                        | 16                      | $\geq 2$                                  |
| Kanamycin                    | 6                          | R                                        | 16                      | $\geq 8$                                  |
| Tetracycline                 | 6                          | R                                        | 32                      | $\geq 8$                                  |

\*The microbiological breakpoints reported by the FEEDAP were used to categorize bacteria as susceptible or resistant. The strains showing a MIC higher than the EFSA breakpoint were considered resistant. Susceptible (S): a bacterial strain is defined as susceptible when it is inhibited at a concentration of a specific antimicrobial equal to or lower than the established cut-off value ( $S \leq x$  mg / L). Resistant (R): a bacterial strain is defined as resistant when it is not inhibited at a concentration of a specific antimicrobial above the established cut-off value ( $R > x$  mg / L). \*\* MIC reference for *E. coli*
